# Supplementary material
Source: PubMed Central journal article supplement (PMC4512793)
Supplement: Angus_CopyofSurvey.pdf [file Angus_CopyofSurvey.pdf]

Please do not put your name on this survey, it is meant to be anonymous.

The ACGME in conjunction with other academic organizations have developed a series of 22 milestones within the 6 ACGME competencies. Starting in June 2014, and every six months thereafter, programs will have to submit milestone ratings to the ACGME for each individual resident.

**\*1. What is your PGY year?**

- PGY 1
- PGY 2
- PGY 3

**\*2. Has your program informed you of the new milestones?**

- Yes
- No

**\*3. How have they informed you? (choose all that apply)**

- Email
- Resident meetings
- Sent us milestones to read
- Posted on web
- Other (please specify)

**\*4. For your most recent biannual evaluation, did you receive feedback in milestone language?**

- Yes
- No

**\*5. How useful was this information in helping you identify areas of strength?**

- Extremely useful
- Very useful
- Somewhat useful
- Not very useful
- Not at all useful

**\*6. How useful was this information in helping you identify areas of weakness?**

- Extremely useful
- Very useful
- Somewhat useful
- Not very useful
- Not at all useful

**\*7. How useful was this information in helping you identify specific areas that you needed to improve upon?**

- Extremely useful
- Very useful
- Somewhat useful
- Not very useful
- Not at all useful

**\*8. How useful was this information in giving you a sense of whether or not you were progressing in your professional development at the expected rate?**

- Extremely useful
- Very useful
- Somewhat useful
- Not very useful
- Not at all useful

Angus S, Moriarty J, Nardino RJ, Chmielewski A, Rosenblum MJ. Internal Medicine Residents' Perspective on Receiving Feedback in Milestone Format. J Grad Med Edu. 2015;7(2):220-224.

**\*9. Compared to previous feedback you have received at biannual evaluations (prior to use of milestones) the information you received in the milestone format was more helpful.**

- Strongly agree
- Agree
- Neither agree or disagree
- Disagree
- Strongly disagree
- N/A: I am a PGY1 and this was my first biannual evaluation

Thank you for your participation.

Angus S, Moriarty J, Nardino RJ, Chmielewski A, Rosenblum MJ. Internal Medicine Residents' Perspective on Receiving Feedback in Milestone Format. J Grad Med Edu. 2015;7(2):220-224.
